# Supplementary material for: Solvent effects on free-radical copolymerization of styrene and 2-hydroxyethyl methacrylate: a DFT study
Source: Royal Society of Chemistry journal article supplement (doi:10.1039/c3nj00820g), 2013-10-11
Supplement: c3nj00820g.pdf [file c3nj00820g.pdf]

## SUPPORTING INFORMATION

### Solvent Effects on Free-Radical Copolymerization of Styrene and 2-Hydroxyethyl methacrylate: A DFT Study

T. Furuncuoğlu Özaltın, B. Dereli, Ö. Karahan, S. Salman<sup>‡</sup>, V. Aviyente

Boğaziçi University, Department of Chemistry, 34342, Bebek, İstanbul, Turkey

<sup>‡</sup> İstanbul *Bilgi University*, Faculty of Engineering, 34060, Eyüp, İstanbul, Turkey

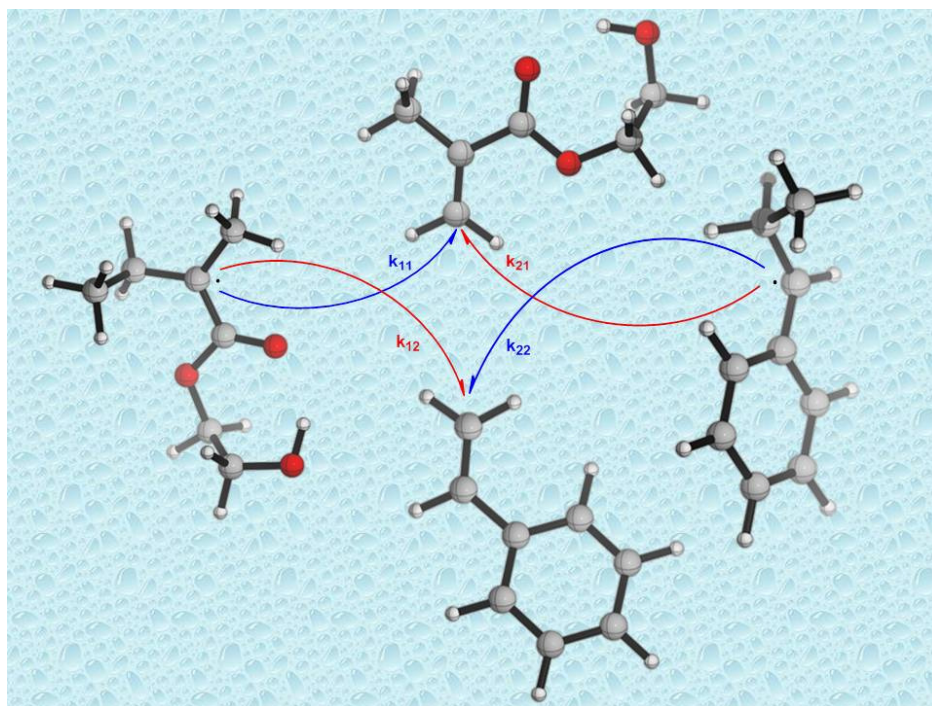

## Propagation Rate Coefficient and Radical Reactivity Calculations in Penultimate Model

Apart from bootstrap effect, other factors such as solvent polarity, radical-solvent and monomer-solvent complexes are demonstrated to affect the free-radical copolymerization.<sup>1</sup> Thus, when the Mayo-Lewis *copolymer composition* equation (also known as the terminal model) is not sufficient to explain the solvent effects, penultimate unit effects are used to explain the solvent dependence of copolymerization. According to penultimate unit model as originally formulated by Merz *et al.*<sup>2</sup> and used by Fukuda and co-workers,<sup>3, 4</sup> the solvent modifies the overall propagation rate coefficient,  $\langle k_{p, \text{cop}} \rangle$ , by affecting the reactivity of the radicals and penultimate units, where a propagation rate coefficient,  $k_{ijk}$  ( $i, j, k = 1$  or  $2$ ), refers to the addition of monomer  $k$  to polymeric radical  $j$ , with  $i$  being the penultimate unit. The overall propagation rate coefficient,  $\langle k_{p, \text{cop}} \rangle$ , in the penultimate model is:

$$\langle k_{p, \text{cop}} \rangle = \frac{\bar{r}_1 f_1^2 + 2f_1 f_2 + \bar{r}_2 f_2^2}{\left(\frac{\bar{r}_1 f_1}{k_{11}}\right) + \left(\frac{\bar{r}_2 f_2}{k_{22}}\right)} \quad (1)$$

where

$$\overline{k_{11}} = \frac{k_{111}(r_1 f_1 + f_2)}{r_1 f_1 + \frac{f_2}{s_1}} \quad \text{and} \quad \overline{k_{22}} = \frac{k_{222}(r_2 f_2 + f_1)}{r_2 f_2 + \frac{f_1}{s_2}} \quad (2)$$

and the radical reactivity ratios are defined as:

$$s_1 = k_{211}/k_{111} \quad \text{and} \quad s_2 = k_{122}/k_{222} \quad (3)$$

According to the penultimate unit model, the solvent effect on copolymerization may be *explicit* or *implicit*. If the solvent modifies both copolymer composition and propagation rate coefficient, it is known as an *explicit* solvent effect; whereas, if solvent only influences the propagation rate coefficient without changing the copolymer composition (the situation when  $\bar{r}_1 = r_1$  and  $\bar{r}_2 = r_2$ ), then it is named as an *implicit* solvent effect following the original terminology used by Fukuda and co-workers.<sup>4</sup> For instance, in the case of styrene/methyl methacrylate (ST/MMA) system in benzyl alcohol, it is found that the modifications in the

monomer reactivity ratios in solvent are minor, so, the copolymer composition is unchanged, but solvent induces an implicit solvent effect in the propagation rate coefficient.<sup>5</sup>

For example, it is now very well demonstrated that polar solvents significantly affect the copolymerization reactions of donor-acceptor type copolymers through stabilization of their charge-transfer type transition state. The solvent can also affect the reaction through complex formation either with the propagating radical or the monomer.<sup>1</sup> H-bonding interactions are shown to significantly modify the copolymerization kinetics. For instance, the observed solvent dependence of the propagation rate coefficient for ST/HEMA system in alcohols is explained by an implicit penultimate unit effect specific to H-bonding.<sup>6</sup>

1. M. L. Coote, T. P. Davis, B. Klumperman and M. J. Monteiro, *J Macromol Sci R M C*, 1998, **C38**, 567-593.
2. E. Merz, T. Alfrey and G. Goldfinger, *Journal of Polymer Science*, 1946, **1**, 75-82.
3. T. Fukuda, Y. D. Ma and H. Inagaki, *Macromolecules*, 1985, **18**, 17-26.
4. T. Fukuda, K. Kubo and Y. D. Ma, *Prog Polym Sci*, 1992, **17**, 875-916.
5. K. F. ODriscoll, M. L. Monteiro and B. Klumperman, *J Polym Sci Pol Chem*, 1997, **35**, 515-520.
6. K. Liang and R. A. Hutchinson, *Macromolecules*, 2010, **43**, 6311-6320.

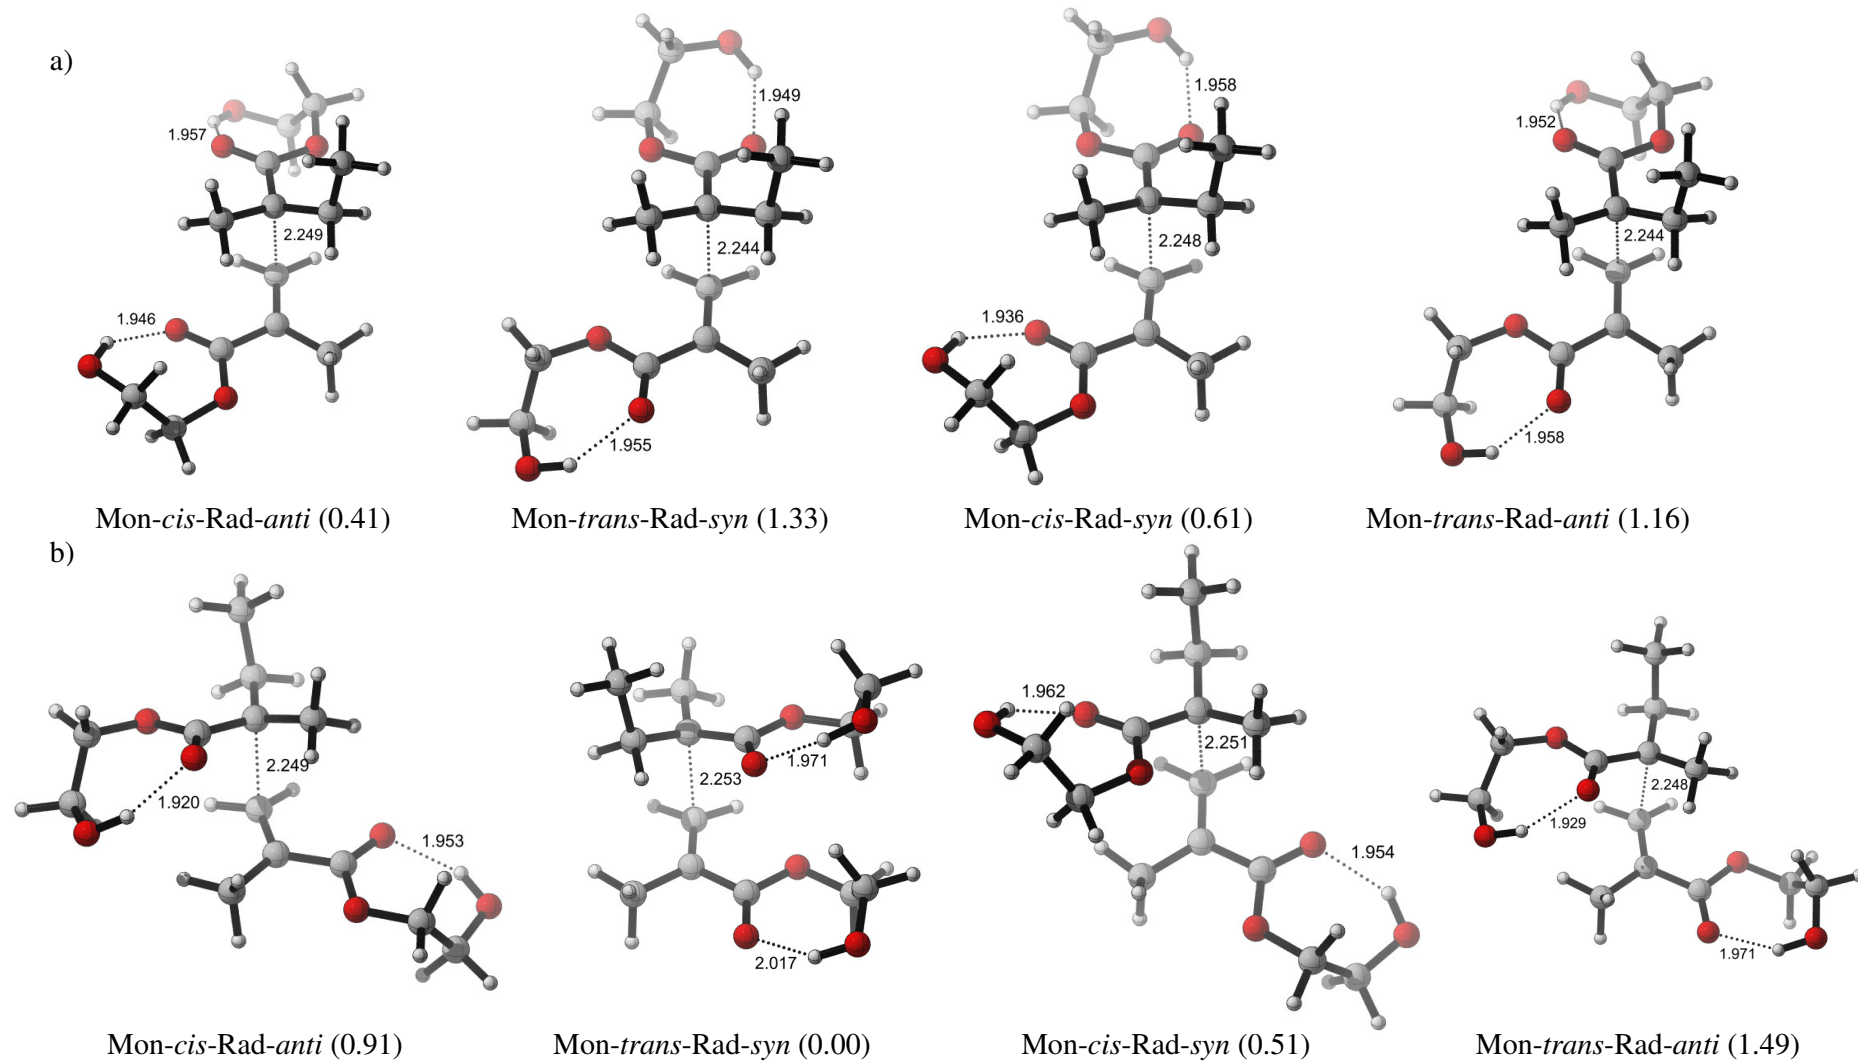

**Figure S1.** Gas phase optimized geometries of a) Pro-meso and b) Pro-racemo transition states with M06-2X/6-31+G(d,p) methodology (Relative Gibbs Free Energies (kcal/mol) are in parenthesis).

**Table S1.** Sum of electronic and thermal Gibbs Free Energies for the structures in Figure S1.

|                                     | <b>Pro-meso</b> | <b>Pro-racemo</b> |
|-------------------------------------|-----------------|-------------------|
| Mon- <i>cis</i> -Rad- <i>anti</i>   | -959.8547126    | -959.8539292      |
| Mon- <i>trans</i> -Rad- <i>syn</i>  | -959.8532521    | -959.8553738      |
| Mon- <i>cis</i> -Rad- <i>syn</i>    | -959.8543982    | -959.8545557      |
| Mon- <i>trans</i> -Rad- <i>anti</i> | -959.8535183    | -959.8529964      |

**Table S2. Sample Calculation in Toluene for HEMA-HEMA Homopolymerization (M06-2X/6-31+G(d,p))**

| T=298.15 K             | HF Energy in PCM | Thermal correction to Gibbs Free Energy in PCM (Hartree/Particle) | Zero point Correction in PCM (Hartree/Particle) | COSMORS $\Delta\Delta G$ (kcal/mol) | Bimolecular Correction ( $RT\ln(24.5)$ ) (kcal/mol) |
|------------------------|------------------|-------------------------------------------------------------------|-------------------------------------------------|-------------------------------------|-----------------------------------------------------|
| HEMA monomer           | -460.1478923     | 0.123553                                                          | 0.159206                                        | -6.85231894                         | 1.9                                                 |
| HEMA radical           | -500.0206983     | 0.158193                                                          | 0.197557                                        | -7.88562909                         |                                                     |
| HEMA-HEMA-Toluene (TS) | -960.1691186     | 0.305711                                                          | 0.358383                                        | -14.31466402                        |                                                     |

$$\begin{aligned} \Delta G^\ddagger \left( \frac{\text{kcal}}{\text{mol}} \right) &= ((\text{HF Energy in PCM} + \text{Thermal correction to Gibbs Free Energy in PCM})_{\text{HEMA-HEMA-Toluene}} \\ &\quad - (\text{HF Energy in PCM} + \text{Thermal correction to Gibbs Free Energy in PCM})_{\text{HEMA monomer}} \\ &\quad - (\text{HF Energy in PCM} + \text{Thermal correction to Gibbs Free Energy in PCM})_{\text{HEMA radical}}) * 627.51 \\ &\quad + (\text{COSMORS } \Delta\Delta G)_{\text{HEMA-HEMA-Toluene}} - (\text{COSMORS } \Delta\Delta G)_{\text{HEMA monomer}} - (\text{COSMORS } \Delta\Delta G)_{\text{HEMA radical}} - RT \ln(24.5) \\ &= ((-960.1691186 + 0.305711) - (-460.1478923 + 0.123553) - (-500.0206983 + 0.158193)) * 627.51 \\ &\quad + (-14.31466402) - (-6.85231894) - (-7.88562909) - 1.9 = 13.23 \end{aligned}$$

$$k_p (\text{L} \cdot \text{mol}^{-1} \cdot \text{s}^{-1}) = \kappa \frac{kT}{h} \frac{RT}{p^\theta} e^{-\Delta G^\ddagger / RT} = \frac{1.38066 * 10^{-23} * 298.15}{6.62608 * 10^{-34}} * \frac{8.3145 * 298.15}{101035} * e^{\frac{-13.23 * 4.184 * 1000}{8.3145 * 298.15}} = 30.6$$

$$\begin{aligned} E_a \left( \frac{\text{kcal}}{\text{mol}} \right) &= ((\text{HF Energy in PCM} + \text{Zero point Correction in PCM})_{\text{HEMA-HEMA-Toluene}} \\ &\quad - (\text{HF Energy in PCM} + \text{Zero point Correction in PCM})_{\text{HEMA monomer}} \\ &\quad - (\text{HF Energy in PCM} + \text{Zero point Correction in PCM})_{\text{HEMA radical}}) * 627.51 = 0.69 \end{aligned}$$

$$A (\text{L} \cdot \text{mol}^{-1} \cdot \text{s}^{-1}) = \frac{k_p}{e^{\frac{-E_a}{RT}}} = \frac{30.6}{e^{1.986 * 298.15}} = 97$$

**Table S3.** Gas phase standard (at 298 K), activation barriers and stabilization energies  
(M06-2X/6-31+G(d,p)).

|                             | Stabilization<br>Energy in DMF<br>(kcal/mol) | Stabilization<br>Energy in Toluene<br>(kcal/mol) | E <sub>a</sub><br>(kcal/mol) |
|-----------------------------|----------------------------------------------|--------------------------------------------------|------------------------------|
| HEMA monomer                | -9.24                                        | -2.69                                            |                              |
| HEMA radical                | -9.46                                        | -2.90                                            |                              |
| ST monomer                  | -3.17                                        | -1.51                                            |                              |
| ST radical                  | -2.48                                        | -1.12                                            |                              |
| HEMA-HEMA homopropagation   | -20.56                                       | -4.85                                            | 2.35                         |
| ST-ST homopropagation       | -3.77                                        | -1.60                                            | 3.97                         |
| HEMA-ST(R) copolymerization | -10.44                                       | -3.75                                            | 2.96                         |
| ST-HEMA(R) copolymerization | -15.21                                       | -3.39                                            | 0.47                         |

## CALCULATIONS IN BULK (M06-2X/6-31+G(d,p))

### REACTANTS

#### *s-trans*-HEMA-bulk

C,-1.1626053185,-0.426754434,0.1097698218\H,-0.4109699489,-1.1811660023,0.31247332  
91\H,-1.6539150171,0.0420568073,0.9570257488\C,-1.4824657362,-0.0770612017,-1.1396  
385931\C,-2.5091023569,0.9593732792,-1.4968030842\H,-3.297963075,0.5255028537,-2.11  
81187783\H,-2.0551785319,1.7687669807,-2.0756902547\H,-2.9578877533,1.3765861126,-  
0.5940192879\C,-0.8055271018,-0.7212371308,-2.3033311938\O,-1.040943197,-0.4014643  
274,-3.4572159571\O,0.0693878112,-1.6704636265,-1.9742042042\C,0.8522023502,-2.2699  
867514,-3.0284816057\H,1.5859359391,-2.8643696044,-2.4836852324\H,1.3634701837,-1.  
481404251,-3.5893434244\C,0.0459536193,-3.1569725674,-3.9732404367\H,-0.796115539,  
-3.5927099533,-3.4163332396\H,0.687940632,-3.9788398058,-4.3013962737\O,-0.3889872  
085,-2.5056964121,-5.1496453523\H,-0.7982297515,-1.6701619653,-4.8771219816\\Versio  
n=EM64L-G09RevB.01\State=1-A\HF=-460.1509195\

Sum of electronic and zero-point Energies= -459.991913

Sum of electronic and thermal Energies= -459.982009

Sum of electronic and thermal Enthalpies= -459.981065

Sum of electronic and thermal Free Energies= -460.027681

#### *anti*-HEMA-R-bulk

C,0.3690844844,-1.1039386524,0.7994226127\C,0.6018379721,-2.5657774809,0.655250706  
9\H,0.8976436476,-2.8305152816,-0.3598017769\H,-0.3028863369,-3.1228693415,0.92846  
23812\H,1.3883472722,-2.8913234262,1.3490276015\C,0.6843634278,-0.2289403089,-0.31  
14714348\O,1.1592544757,-0.6090830355,-1.3829732996\O,0.4043574699,1.0648232013,-0  
.0643869879\C,0.7822402368,2.0390991047,-1.0538295014\H,1.839186707,1.9085987319,-  
1.3087249778\H,0.6486595099,2.9895558251,-0.5358330403\C,-0.074832918,2.003363681  
5,-2.3155202497\H,-0.1419265811,3.0195474602,-2.7144331809\H,-1.09087434,1.6838154  
146,-2.0403043736\O,0.4564398841,1.2046189472,-3.3539503367\H,0.7464346762,0.37209  
10023,-2.9478417481\C,-0.2536313426,-0.5694604176,2.0483257917\H,0.18506464,0.3989  
680041,2.3056502806\H,-0.0479970478,-1.2631259879,2.8703077994\C,-1.7769204212,-0.4  
063719919,1.8863133494\H,-2.2207332237,-0.040775451,2.8159925682\H,-2.2464365913,-



1.3621418814,1.6354394612\H,-2.002674601,0.308843884,1.0908773548\\Version=EM64L-G09RevB.01\State=2-A\HF=-500.0239641\

Sum of electronic and zero-point Energies= -499.826587  
Sum of electronic and thermal Energies= -499.814597  
Sum of electronic and thermal Enthalpies= -499.813653  
Sum of electronic and thermal Free Energies= -499.866011

### ST-radical-bulk

C,-1.7863767097,0.2486298148,1.5103828172\C,-2.6232145815,-0.2694139662,2.63548446  
1\C,-2.4589007288,0.5653662898,3.9191002696\C,-0.4029191923,-0.02707753,1.34188673  
26\C,0.310265036,0.5481927531,0.2554707291\C,1.658189466,0.2925122732,0.062004025  
6\C,2.3535632215,-0.5452247849,0.9428362836\C,1.6742460072,-1.1210222773,2.0213165  
122\C,0.3239136881,-0.8712349474,2.2236582492\H,2.1760966409,0.7451112864,-0.77840  
85241\H,-0.1805961639,-1.3263693534,3.0706419608\H,3.4092134265,-0.7455476554,0.79  
14845971\H,2.2064795897,-1.7702654672,2.7103908083\H,-3.0869705922,0.1693303975,4.  
7224389083\H,-2.7443374594,1.6062124816,3.7406785598\H,-1.418263265,0.5551782213,  
4.2570109118\H,-2.2478304191,0.9317314364,0.8015756699\H,-0.2231695409,1.19922293  
47,-0.4326688945\H,-3.676008807,-0.2589884203,2.3361282807\H,-2.3693836162,-1.31434  
54866,2.852588642\\Version=EM64L-G09RevB.01\State=2-A\HF=-349.3955706\

Sum of electronic and zero-point Energies= -349.222828  
Sum of electronic and thermal Energies= -349.214343  
Sum of electronic and thermal Enthalpies= -349.213399  
Sum of electronic and thermal Free Energies= -349.256830

### TRANSITION STATES

#### HEMA-HEMA-Bulk

C,0.825767371,0.8087044484,-0.4218023441\C,1.3604849642,0.2257933002,0.8489005753\  
H,2.2944828772,0.7290195032,1.132606536\H,1.5837636108,-0.8376894091,0.7130115518  
\H,0.6551915999,0.3441849665,1.6736813942\C,0.181104005,2.1217152734,-0.3006783065  
\O,-0.1071845495,2.6476701789,0.7693839845\O,-0.1164084249,2.6756348313,-1.4858100  
569\C,-0.7295759155,3.9802215703,-1.4877157719\H,-0.7213536567,4.2575415155,-2.5423

239516\H,-0.1011017992,4.6761923076,-0.9228272534\C,-2.1568481074,3.9955337776,-0.9  
446658035\H,-2.6192296494,3.0166640239,-1.1420167238\H,-2.7263859383,4.7481781707,  
-1.4966288116\O,-2.2543356937,4.3513599017,0.4191984829\H,-1.6111678074,3.80523603  
44,0.8987827311\C,1.5183082296,0.456090291,-1.7091474529\H,0.8797139346,0.69368766  
69,-2.5645517451\H,1.705881439,-0.6228659335,-1.7214149998\C,2.8530902371,1.207281  
9098,-1.8483779162\H,3.3454711364,0.9340337352,-2.7852183425\H,3.5308085363,0.9646  
138208,-1.0251799984\H,2.6890463931,2.2889670335,-1.8523888828\C,-1.1593415609,-0.2  
276334735,-0.6520950092\H,-1.5921713357,0.3152567892,0.1842095811\H,-1.2758785165,  
0.1945408389,-1.6464730447\C,-0.8887693336,-1.5593399681,-0.5039305658\C,-0.459603  
884,-2.4541133344,-1.6277036526\H,-1.1216369404,-3.3218621446,-1.7105195735\H,0.550  
7932168,-2.844348346,-1.4600609435\H,-0.4724625137,-1.9097151336,-2.5741381939\C,-0  
.9542342675,-2.1057720975,0.8672380465\O,-1.3074648877,-1.4717606183,1.8528492822\  
O,-0.5742460597,-3.3868566783,0.9262080076\C,-0.6418993013,-4.0520499325,2.2039207  
988\H,-0.4522556542,-5.0958733557,1.953293167\H,-1.6526763189,-3.9508208637,2.6113  
951684\C,0.3902806038,-3.5493646734,3.2106044419\H,1.273051833,-3.1925726354,2.659  
4760274\H,0.7045024177,-4.3927027254,3.8311668211\O,-0.0970752211,-2.566900195,4.1  
014806843\H,-0.5524380685,-1.8978783709,3.567260062\\Version=EM64L-G09RevB.01\St  
ate=2-A\HF=-960.171915\

Sum of electronic and zero-point Energies= -959.813862  
Sum of electronic and thermal Energies= -959.791611  
Sum of electronic and thermal Enthalpies= -959.790667  
Sum of electronic and thermal Free Energies= -959.867839

### HEMA-ST(R)-Bulk

C,0.6993607827,0.6255374596,-0.7140977241\H,1.493434856,1.2655828322,-1.082551729  
5\H,0.0422717894,1.0459033317,0.0423094577\C,0.7824010363,-0.7337220048,-0.8437118  
055\C,-0.1477907941,-1.6874563739,-0.1530966767\H,-0.7240718889,-2.278512629,-0.873  
5523207\H,-0.8440980927,-1.1427613401,0.4880143778\H,0.4118562609,-2.3994011734,0  
.4624425328\C,1.772829385,-1.3405430715,-1.7408976526\O,1.9047108785,-2.5527157065  
, -1.8773842088\O,2.5256510014,-0.4538977957,-2.410252448\C,3.4643223445,-0.95658167  
94,-3.3802345488\H,3.809354501,-0.0531839884,-3.8846354196\H,2.9382672939,-1.59574  
77405,-4.0970002128\C,4.6479238872,-1.7053196457,-2.7731652795\H,4.860018213,-1.282  
4495543,-1.7802958523\H,5.5238898097,-1.5301700133,-3.4036024063\O,4.4789155935,-3

.1074522246,-2.7154876007\H,3.6004498502,-3.2692316189,-2.3356278415\C,-0.61756911  
26,1.4115353554,-2.3634446328\H,0.9224918437,3.5732797934,-2.6827627483\C,0.039641  
8385,3.7786638974,-2.0816612372\C,-2.2247269926,4.3006738369,-0.5471817241\C,-0.168  
3541518,5.0515431629,-1.5658118178\C,-0.8833594089,2.7364410122,-1.8469413399\C,-2.  
0198347369,3.0250570253,-1.0608860911\C,-1.3030323043,5.3208561208,-0.7954862175\  
H,0.5528065554,5.8385564938,-1.7646730141\H,-2.7476658087,2.2447087239,-0.85728219  
95\H,-1.4675942953,6.3153462072,-0.3931751877\H,-3.1084923966,4.5030050903,0.05042  
40997\H,0.183107563,1.3494674407,-3.0991805799\C,-1.6839588506,0.362244362,-2.4742  
502126\H,-1.2096057293,-0.594581297,-2.7168539059\H,-2.1908285917,0.2212203632,-1.5  
112081961\H,-3.4618023932,-0.0890030118,-3.6469727388\C,-2.7170403822,0.7069057052  
, -3.5582690556\H,-3.2370856076,1.6401591645,-3.3232315187\H,-2.2297907457,0.829040  
4904,-4.5303233232\\Version=EM64L-G09RevB.01\State=2-A\HF=-809.5426856\

Sum of electronic and zero-point Energies= -809.209554  
Sum of electronic and thermal Energies= -809.190356  
Sum of electronic and thermal Enthalpies= -809.189412  
Sum of electronic and thermal Free Energies= -809.260298

## SOLUTION PHASE CALCULATIONS – DMF (M06-2X/6-31+G(d,p))

### REACTANTS

#### *s-trans*-HEMA-DMF

C,-0.9577828619,2.0033672958,3.4338400225\H,-1.2628506146,0.9696718588,3.31663057  
44\H,-1.4365401315,2.5899529661,4.2120902084\C,-0.022392322,2.548534282,2.65038706  
05\C,0.4482121784,3.9710963263,2.7546404765\H,0.2746427124,4.505975118,1.81626724  
66\H,1.5233612845,4.0097653633,2.9523877137\H,-0.0782715693,4.4875070948,3.558810  
2324\C,0.6347535225,1.7434734689,1.5775989722\O,1.4889222379,2.1993350946,0.83939  
70442\O,0.2042266695,0.478502774,1.5036948688\C,0.7752453369,-0.3528070179,0.48132  
09546\H,0.6222740811,-1.3776570265,0.8218433881\H,1.8477170566,-0.1526428941,0.398  
6263954\C,0.0653099248,-0.1275399677,-0.8501534551\H,0.1719863145,0.9219018353,-1.  
158109684\H,-1.0017129305,-0.3355827087,-0.7253699318\O,0.5724394601,-1.007638475  
7,-1.8286808117\H,1.4121906466,-0.6269196628,-2.1628541639\C,3.1277752974,1.304300  
7475,-1.9295361571\H,2.5393941188,1.5851397659,-1.0437204912\O,2.8441963966,0.3056

267834,-2.6101983266\N,4.1462526858,2.1329099217,-2.1743355517\C,5.0426347964,1.93  
01152978,-3.2998713778\H,5.0182649785,2.8060319226,-3.9548481159\H,4.7225471255,1  
.048823556,-3.8529578323\H,6.0653665791,1.7869340082,-2.9386335967\C,4.4046672816,  
3.277654073,-1.315132415\H,4.3399629621,4.20342876,-1.8943277512\H,5.4055350458,3.  
2006533077,-0.8803908631\H,3.6656717368,3.3040831318,-0.5124136333\\Version=AM64  
L-G09RevC.01\State=1-A\HF=-708.5816119\

Sum of electronic and zero-point Energies= -708.317469

Sum of electronic and thermal Energies= -708.299832

Sum of electronic and thermal Enthalpies= -708.298888

Sum of electronic and thermal Free Energies= -708.365671

### ***anti*-HEMA-R-DMF**

C,-0.7303075157,-0.5335852217,-0.3395986687\C,0.2913056909,-1.298108963,0.42450351  
29\H,1.1187241999,-1.5884585263,-0.2361308214\H,-0.1423659159,-2.2312188651,0.8060  
504612\H,0.6917279809,-0.7204705086,1.2577371849\C,-0.9904685868,0.8469011976,0.01  
79468477\O,-0.4069171373,1.4628715271,0.9073143735\O,-1.958016056,1.4124802626,-0  
.7396775979\C,-2.3311756912,2.7586300135,-0.4266949253\H,-2.7901354532,3.154977576  
3,-1.33398538\H,-1.4410154614,3.3473660109,-0.1844152225\C,-3.3359476824,2.78054868  
36,0.7216644711\H,-2.8892036561,2.3253002101,1.6167482117\H,-4.2093751706,2.183140  
5304,0.4416197576\O,-3.7684047353,4.0999201107,0.9734866049\H,-3.0869313549,4.5364  
932637,1.5271702039\C,-1.5295409806,-1.2177840394,-1.4012364136\H,-0.9611845641,-2.  
0772137282,-1.7715389369\H,-1.7008478955,-0.5397234556,-2.2425845651\C,-2.88806740  
57,-1.6986324201,-0.8570777376\H,-3.4448516515,-2.2240702619,-1.6373042137\H,-3.485  
7080433,-0.848202231,-0.5175149942\H,-2.7496060045,-2.3830770537,-0.0149398706\N,0  
.2979617178,4.4364305281,3.4018212889\C,1.3934497947,3.4794328798,3.388093184\H,2.  
3191878876,3.9754655923,3.0815556406\H,1.1645946336,2.6766469501,2.6846369406\H,1  
.5329119753,3.0560149153,4.3869962549\C,0.4237506407,5.5806149525,4.2883411631\H,  
1.3071224984,6.1659083341,4.0157238451\H,0.53198265,5.2372816908,5.3214601881\H,-  
0.4679124266,6.1986870831,4.1979309294\C,-0.7729557376,4.2642221452,2.6223031859\  
H,-0.722603034,3.3524301114,2.0089633798\O,-1.7451765096,5.0347797056,2.568631717  
7\\Version=AM64L-G09RevC.01\State=2-A\HF=-748.4544659\

Sum of electronic and zero-point Energies= -748.151786

Sum of electronic and thermal Energies= -748.132000  
Sum of electronic and thermal Enthalpies= -748.131055  
Sum of electronic and thermal Free Energies= -748.203820

### ST-monomer-DMF

C,-3.0379373447,1.9640132408,-4.0729398661\C,-3.8356947404,1.784494459,-2.93989337  
6\C,-3.5403865983,0.7803579267,-2.0233277952\C,-2.4383220235,-0.0666878009,-2.21883  
19729\C,-1.6483696025,0.1223590904,-3.3608084496\C,-1.9424616275,1.1281737758,-4.28  
07745102\C,-2.0784798116,-1.144990581,-1.2757384575\C,-2.6807325221,-1.4296226649,-  
0.1164945003\H,-0.7928747806,-0.5276011165,-3.5269004164\H,-1.3158461661,1.2567822  
832,-5.1579127779\H,-4.1757748549,0.6552866646,-1.1518430171\H,-3.2716708896,2.748  
0427324,-4.7862783462\H,-4.6926649057,2.4296132372,-2.7720257513\H,-1.2271201354,-  
1.7522386036,-1.5811115779\H,-3.5307047189,-0.8663100189,0.2576573959\H,-2.3289592  
781,-2.2496716243,0.5002244186\Version=AM64L-G09RevC.01\State=1-A\HF=-309.5241  
276\

Sum of electronic and zero-point Energies= -309.389901  
Sum of electronic and thermal Energies= -309.383138  
Sum of electronic and thermal Enthalpies= -309.382194  
Sum of electronic and thermal Free Energies= -309.421476

### ST-radical-DMF

C,-1.7863116236,0.2488160362,1.5108539504\C,-2.6232954863,-0.2695443592,2.63568543  
2\C,-2.4598067107,0.5657468877,3.9191316216\C,-0.4027533461,-0.027051563,1.3421412  
838\C,0.3103576864,0.5484642335,0.255363587\C,1.6584454903,0.292589634,0.06152661  
85\C,2.3541191706,-0.5455277456,0.9421951961\C,1.6748673357,-1.1213989932,2.021022  
6877\C,0.3243458307,-0.8716070146,2.2238303889\H,2.17612827,0.7452749211,-0.778990  
1292\H,-0.1796995745,-1.3269204986,3.0709930899\H,3.4097161999,-0.745963499,0.7905  
524233\H,2.2072058547,-1.7707189329,2.7099505641\H,-3.0895243976,0.1702743719,4.72  
13688696\H,-2.7443158906,1.6067243073,3.7398527071\H,-1.4197849741,0.5538268468,4.  
2590790865\H,-2.2476035382,0.9323405599,0.8023363995\H,-0.2230733023,1.199686774  
8,-0.4326124892\H,-3.6758763196,-0.2588797453,2.3358865281\H,-2.3691416748,-1.31413  
12216,2.8538331842\Version=AM64L-G09RevC.01\State=2-A\HF=-349.39628\

Sum of electronic and zero-point Energies= -349.223572  
Sum of electronic and thermal Energies= -349.215086  
Sum of electronic and thermal Enthalpies= -349.214141  
Sum of electronic and thermal Free Energies= -349.257575

## TRANSITION STATES

### HEMA-HEMA-DMF

C,1.0963352713,2.7528851544,-1.8237409736\C,0.6731375675,1.795169291,-0.7527953079  
\C,-0.5250761472,2.1453057521,0.0825649919\C,-0.1901161905,3.2281791689,1.12172413  
89\C,1.7385545541,0.9787418866,-0.1580425784\O,1.3447151492,0.342478466,0.96100317  
61\C,2.3151002543,-0.4738555466,1.6298130536\C,3.1998175971,0.3831635255,2.5302705  
474\O,4.0992156099,-0.4290234498,3.2518617591\O,2.855629171,0.8394023617,-0.641074  
0504\O,6.0707301557,-0.8326781665,1.3960774573\C,5.7920523259,-0.3911663323,0.2694  
00966\N,6.633365443,-0.3534714014,-0.766985467\C,6.2156969365,0.1897718471,-2.0500  
335919\C,7.9981994887,-0.840819396,-0.6617566655\C,-0.1049628278,0.1441378896,-2.06  
61015676\C,-0.3917085055,-0.9634359875,-1.3189531454\C,-1.7573372082,-1.0733237134  
, -0.7647765906\O,-1.9371724358,-2.2166267827,-0.0830240734\C,-3.2309515289,-2.44243  
09145,0.4954864619\C,-4.2121248226,-2.9649930591,-0.5505654025\O,-5.4501635134,-3.2  
740281414,0.0520989059\C,0.6123306849,-2.0363475358,-1.0193318655\O,-2.6373674426,  
-0.2371538544,-0.9002403813\O,-6.5481677904,-0.7728972414,0.362166463\C,-5.7631842  
693,0.1389379784,0.0553580543\N,-5.9910523708,1.4420203468,0.238804331\C,-7.225361  
3862,1.9270046984,0.8323207642\C,-4.9938508757,2.4336282007,-0.1335434334\H,1.5108  
409435,3.6637480281,-1.370375982\H,0.2385117027,3.0513329238,-2.4332679429\H,1.869  
1719662,2.3255581783,-2.4653016389\H,2.9116091883,-1.0234446705,0.8945118121\H,1.7  
392415344,-1.1804555813,2.2303715194\H,2.5683884756,0.9147760938,3.2491244717\H,3  
.7289164838,1.1335058805,1.9257462206\H,-0.9008611935,1.2551428613,0.593133501\H,-  
1.3221383569,2.5025252549,-0.5791784916\H,-1.0760460531,3.4696466821,1.7151373685\  
H,0.1555850292,4.1472339353,0.6399641481\H,0.5929185521,2.8802537246,1.8028651283  
\H,-0.9104376295,0.808071443,-2.3662754425\H,0.8203803321,0.181013959,-2.634139994  
9\H,0.3210746122,-2.9855320522,-1.4823438233\H,0.6887616599,-2.2184091722,0.056951  
5235\H,1.5961998399,-1.7521944918,-1.4015379524\H,-3.5955520103,-1.5174992853,0.95  
26500003\H,-3.0750826733,-3.1931233314,1.2713011897\H,-3.8110741846,-3.8840014022,  
-0.9883894736\H,-4.3289934728,-2.2278121506,-1.3565339317\H,-5.9290060741,-2.431180

213,0.1994014979\H,8.1548291205,-1.2407143544,0.3386324195\H,8.7008780396,-0.02263  
90921,-0.8461829434\H,8.1673384516,-1.6261099945,-1.4042146768\H,6.838628298,1.049  
4087834,-2.3143010724\H,5.1728979811,0.5066881302,-1.9878282237\H,6.3155654274,-0  
.5720606406,-2.8285728672\H,4.7957930677,0.0130108427,0.0368338329\H,-4.784372078  
3,-0.0700653678,-0.3998372808\H,-5.4046530978,3.117365815,-0.8821481975\H,-4.116866  
9056,1.9297005154,-0.5449116885\H,-4.6956886336,3.0107380657,0.7470300717\H,-7.003  
4413061,2.4759625845,1.7523511967\H,-7.8674502512,1.0772794287,1.0580462954\H,-7.7  
332996923,2.5984458687,0.1337120352\H,4.8446840129,-0.6509012434,2.6543004154\Ve  
rsion=AM64L-G09RevC.01\State=2-A\HF=-1457.0343789\

Sum of electronic and zero-point Energies= -1456.466250  
Sum of electronic and thermal Energies= -1456.428290  
Sum of electronic and thermal Enthalpies= -1456.427346  
Sum of electronic and thermal Free Energies= -1456.544198

#### ST-ST-DMF

C,-0.6124087272,-0.7566558475,3.3486611203\C,0.0139030839,-0.8072534611,2.08517185  
59\C,1.217997626,-1.537055886,1.9767749778\C,1.7738728945,-2.1757682978,3.07856093  
28\C,1.1432510935,-2.1087774915,4.3246604734\C,-0.0517983522,-1.3958118198,4.45018  
81773\C,-0.5613576682,-0.2020995898,0.9042426682\C,-1.6547036613,0.8243659108,0.97  
92747595\C,-1.1447352316,2.1731603232,1.5122677566\C,-1.6844257165,-1.9020106795,-  
0.0625358566\C,-0.8129484235,-2.9372407426,-0.2527342197\C,0.135096253,-3.05331797  
21,-1.3554883498\C,0.276974035,-2.0590974682,-2.3434384084\C,1.2015648449,-2.202464  
9116,-3.3727750921\C,2.0128580341,-3.3377795771,-3.4436229836\C,1.8904498516,-4.329  
3117385,-2.468357691\C,0.9668170973,-4.1862351048,-1.4373341515\H,2.7029792326,-2.7  
276112936,2.9695383138\H,-1.542530602,-0.2087622809,3.4699970939\H,1.578315651,-2.  
6050312439,5.1863660311\H,-0.5494796854,-1.3365906435,5.4137073646\H,0.8783539309  
, -4.9606697668,-0.6791699343\H,2.5174747842,-5.2147608939,-2.5108112102\H,-0.337515  
1244,-1.1642383392,-2.305849642\H,2.7336284453,-3.4451862034,-4.2479572759\H,1.293  
9344546,-1.422003131,-4.1221651948\H,-0.734945151,-3.7006872364,0.5192201403\H,-1.9  
331771463,-1.2198419818,-0.8707237081\H,-2.3975784074,-1.9477415616,0.7553125448\  
H,-1.9509831458,2.9123349604,1.5292178556\H,-0.3406333315,2.558631133,0.878152203  
1\H,-0.7528475569,2.0696504351,2.5285266575\H,0.1155561239,-0.1160403895,0.0542459  
152\H,1.7106122783,-1.5961294744,1.008444048\H,-2.0762578813,0.9725593998,-0.02072

03345\H,-2.4758509021,0.4671288656,1.612659163\\Version=AM64L-G09RevC.01\State=2  
-A\HF=-658.9141344\

Sum of electronic and zero-point Energies= -658.605562

Sum of electronic and thermal Energies= -658.589694

Sum of electronic and thermal Enthalpies= -658.588750

Sum of electronic and thermal Free Energies= -658.651770

### ST-HEMA(R)-DMF

C,0.2560170153,1.7486552839,-0.0056050449\C,0.7211180087,2.5340011874,-1.194827459  
4\H,0.0023129173,2.4708482793,-2.0154259883\H,1.6750249617,2.1310200876,-1.5624364  
381\H,0.8772461971,3.5839763984,-0.9286402547\C,-0.1869308834,0.3821386563,-0.3033  
708993\O,-0.4875143288,-0.0083635333,-1.4199324771\O,-0.3141364046,-0.3873433808,0  
.8012379342\C,-0.8975525819,-1.6918045269,0.6566086262\H,-1.583918924,-1.695178426  
7,-0.1951943525\H,-1.4592970387,-1.8548518247,1.5800289637\C,0.1692368292,-2.760908  
4018,0.5116847204\H,-0.305485541,-3.7357364208,0.6628767851\H,0.9166001645,-2.6235  
133386,1.3078349446\O,0.7811238991,-2.7935049764,-0.760038083\H,1.2710134939,-1.95  
75449978,-0.8992661188\C,0.8393784209,2.0974040662,1.3368516301\H,0.3602340759,1.5  
027130561,2.1186968109\H,0.6170930321,3.1521933796,1.5455772042\C,2.3606233525,1.  
8972134255,1.3918547235\H,2.7424358315,2.1570067294,2.3833759269\H,2.8651232671,2  
.5325782857,0.6574684799\H,2.6226708501,0.8577911428,1.1765561906\C,-2.691557427,1  
.9680690986,-0.5246979537\H,-1.3984905262,3.5582768033,0.0335558113\C,-1.801690833  
6,2.5886761695,0.3102162288\H,-1.7623253817,2.3390943934,1.3668579542\H,-4.0132945  
856,0.4381419204,-2.2615804075\C,-4.0961197507,0.0637790265,-1.2443257039\C,-4.2965  
212503,-0.8977881152,1.3580639967\C,-4.8133594324,-1.1011533589,-0.9899236305\C,-3.  
4528690491,0.7637824921,-0.2066903417\C,-3.5743351494,0.2627851258,1.1034166309\C  
, -4.9155799044,-1.5898400688,0.3139852383\H,-5.2935792807,-1.6285561553,-1.80848357  
1\H,-3.0989186061,0.7829176234,1.9296942668\H,-5.4752978712,-2.4974731191,0.516721  
2582\H,-4.3759366281,-1.2678259033,2.3760031415\H,-2.7820478463,2.329061065,-1.547  
6165314\C,3.530232513,-1.1785615835,-0.3090700952\H,3.4789384458,-2.1863172771,0.1  
319484819\O,2.5611761096,-0.6884279737,-0.9029610817\N,4.7074414648,-0.5725971114,  
-0.1249428663\C,5.7974804721,-1.2222821477,0.584316001\H,6.0977361693,-0.615247746  
5,1.4430137411\H,6.6568863301,-1.346249882,-0.0811544851\H,5.4744149502,-2.2025905  
302,0.9370377592\C,4.9707160496,0.750417788,-0.6673253857\H,5.2446957432,1.4339265



214,0.1420742394\H,4.072190086,1.1129796546,-1.1649252403\H,5.7959765747,0.698234  
1403,-1.384083279\\Version=AM64L-G09RevC.01\State=2-A\HF=-1057.9767484\

Sum of electronic and zero-point Energies= -1057.538323  
Sum of electronic and thermal Energies= -1057.511746  
Sum of electronic and thermal Enthalpies= -1057.510802  
Sum of electronic and thermal Free Energies= -1057.598166

### HEMA-ST(R)-DMF

C,1.9802989906,1.8483794259,-1.5119527849\H,2.0737267204,0.9808088857,-2.15593910  
24\H,2.6437347115,2.6860473397,-1.7094055309\C,0.8177996806,2.0792040582,-0.827228  
3745\C,0.540496158,3.3591843939,-0.0928153235\H,-0.3728656469,3.832234057,-0.46882  
82452\H,1.3704683404,4.0587141986,-0.2118092625\H,0.3849372638,3.1814730023,0.977  
2851821\C,-0.2625894557,1.0780753998,-0.7825950896\O,-1.3353554917,1.2809136491,-0  
.2316088852\O,0.0147263937,-0.053783412,-1.4533413375\C,-1.0038031795,-1.060088414  
1,-1.5282482359\H,-0.8969589325,-1.5116992714,-2.5177154046\H,-1.9873452489,-0.5906  
917005,-1.4444190931\C,-0.8072951623,-2.1164703859,-0.4563050374\H,0.2098557114,-2.  
5144964455,-0.5259016219\H,-1.5125956486,-2.9357538682,-0.6633618112\C,3.570998608  
1,1.0678996087,-0.1388883841\H,4.3555666465,-0.8428308711,-1.8347762285\C,3.787178  
749,-1.2412978268,-0.9972787363\C,2.3401263104,-2.2586047182,1.1524105891\C,3.5591  
874709,-2.60773347,-0.9023101086\C,3.3039660223,-0.3495317445,-0.0138885101\C,2.562  
3784509,-0.8885598231,1.0577802872\C,2.8396090539,-3.126285201,0.1794022875\H,3.94  
7351338,-3.2744941926,-1.666401162\H,2.1632711614,-0.2318926926,1.8253054606\H,2.6  
646177132,-4.1947655826,0.2581948838\H,1.7646976057,-2.6505769772,1.9854709228\H,  
4.330803274,1.3247167249,-0.8764698073\C,3.4546286377,2.0017821132,1.0302029541\H,  
3.5023828608,3.0353097628,0.6701796852\H,2.4775127565,1.8855750026,1.5133882552\H  
,4.4832297254,2.4833716933,2.8874561626\C,4.571129015,1.7727495449,2.0607148207\H,  
4.5217191192,0.7598780119,2.4713515541\H,5.5552544685,1.9035545704,1.6007320275\N  
,5.4706825942,0.2042645556,0.3061138378\C,-5.9499277065,1.4483235583,-0.272509424  
2\H,-6.5631974921,1.2398474863,-1.154242199\H,-5.1014059713,2.0673219283,-0.567050  
3416\H,-6.5540722104,1.994111241,0.4580950713\C,-6.4771404236,-0.744453068,0.75197  
28756\H,-7.0896239575,-1.0639212594,-0.0967962163\H,-7.1247802228,-0.2723159143,1.4  
965886244\H,-5.9806649581,-1.6076052185,1.1919873584\C,-4.1636872417,-0.0607729124  
,0.4070458694\H,-3.5079314866,0.7384157644,0.0337813211\O,-3.6890737504,-1.1063921

35,0.8745128854\O,-0.9689122211,-1.6170563108,0.8522732807\H,-1.9015979564,-1.3341  
685611,0.9417240618\\Version=AM64L-G09RevC.01\State=2-A\HF=-1057.974044\

Sum of electronic and zero-point Energies= -1057.535672  
Sum of electronic and thermal Energies= -1057.508903  
Sum of electronic and thermal Enthalpies= -1057.507959  
Sum of electronic and thermal Free Energies= -1057.597253

## SOLUTION PHASE CALCULATIONS – Toluene (M06-2X/6-31+G(d,p))

### REACTANTS

#### *s-trans*-HEMA-Toluene

C,-1.1572164964,-0.4236393639,0.1142122408\H,-0.4020315187,-1.1744193855,0.3168942  
808\H,-1.6486092424,0.0459952396,0.9610284365\C,-1.4809536039,-0.0799225617,-1.1354  
71414\C,-2.5121962612,0.950367972,-1.4963080659\H,-3.2990344316,0.5099369676,-2.115  
3816028\H,-2.0622717387,1.7571194409,-2.0818178187\H,-2.961737742,1.3712132193,-0  
.5954497628\C,-0.8041404597,-0.7252602393,-2.29932608\O,-1.0476627178,-0.414602912  
1,-3.4522686804\O,0.0815717552,-1.6653861255,-1.9674641663\C,0.8540181887,-2.267871  
616,-3.0264777912\H,1.5881255545,-2.8658240023,-2.4854607403\H,1.365616463,-1.4819  
47658,-3.5910365887\C,0.0365125987,-3.1467296411,-3.9722567546\H,-0.8246920245,-3.5  
517756971,-3.4200418027\H,0.65851866,-3.9919861751,-4.2796364484\O,-0.3590444176,-  
2.5033661722,-5.1625124243\H,-0.7797715658,-1.6679022895,-4.9102258168\\Version=A  
M64L-G09RevC.01\State=1-A\HF=-460.1478923\

Sum of electronic and zero-point Energies= -459.988686  
Sum of electronic and thermal Energies= -459.978811  
Sum of electronic and thermal Enthalpies= -459.977867  
Sum of electronic and thermal Free Energies= -460.024339

#### *anti*-HEMA-R-Toluene

C,0.3705829501,-1.1021656182,0.8031140467\C,0.594265195,-2.5645211023,0.6476023082  
\H,0.9135174575,-2.8164689035,-0.3636770688\H,-0.3225554649,-3.1176541028,0.888368  
8681\H,1.3593523742,-2.9071867032,1.3567672834\C,0.6857387692,-0.2237850141,-0.306

7532634\O,1.1469231806,-0.602820359,-1.3818189609\O,0.419577796,1.0720302416,-0.04  
92655932\C,0.7816907799,2.039989303,-1.0500414158\H,1.8382963456,1.9178935609,-1.3  
108175246\H,0.6412460081,2.9932869902,-0.5385349905\C,-0.0788828147,1.9791093052,-  
2.3111274314\H,-0.2021578381,2.9955314359,-2.6959769284\H,-1.0764114062,1.60468562  
42,-2.0345181057\O,0.4868164503,1.2290792484,-3.3625363449\H,0.7793028216,0.385760  
0722,-2.9835429881\C,-0.2503918738,-0.5701259624,2.0541472574\H,0.1948339922,0.394  
1085886,2.3165059555\H,-0.0510203596,-1.2689498135,2.8736410352\C,-1.7719362508,-0.  
3936608387,1.8909150016\H,-2.2161519893,-0.0318790295,2.821967145\H,-2.2492627217,  
-1.3431714927,1.6307287772\H,-1.9893744013,0.3299165695,1.100851937\Version=AM6  
4L-G09RevC.01\State=2-A\HF=-500.0206983\

Sum of electronic and zero-point Energies= -499.823141  
Sum of electronic and thermal Energies= -499.811168  
Sum of electronic and thermal Enthalpies= -499.810224  
Sum of electronic and thermal Free Energies= -499.862505

#### ST-monomer-Toluene

C,-3.0303546917,1.9717497047,-4.0640137692\C,-3.8454064138,1.7720753338,-2.9476222  
359\C,-3.5602968256,0.7562051242,-2.0417845109\C,-2.4502362791,-0.080665822,-2.2296  
782619\C,-1.6459517,0.1254975964,-3.3577088908\C,-1.929305524,1.1430233756,-4.26697  
55295\C,-2.1005041464,-1.1665920553,-1.2927214861\C,-2.654962545,-1.4017552611,-0.0  
999767321\H,-0.785770818,-0.5193256124,-3.5197276251\H,-1.2903911936,1.2861712072  
, -5.1329417468\H,-4.2126703139,0.6078941024,-1.1865806969\H,-3.2566514449,2.764251  
0715,-4.7703510078\H,-4.7101132792,2.4085684539,-2.7865181458\H,-1.2986202818,-1.82  
17480712,-1.6311788541\H,-3.4465980594,-0.7808818379,0.309163079\H,-2.3201664836,-  
2.2324663098,0.5116174138\Version=AM64L-G09RevC.01\State=1-A\HF=-309.5217826\

Sum of electronic and zero-point Energies= -309.387513  
Sum of electronic and thermal Energies= -309.380734  
Sum of electronic and thermal Enthalpies= -309.379790  
Sum of electronic and thermal Free Energies= -309.419305

#### ST-radical-Toluene

C,-1.7866697777,0.2488663962,1.5090425514\C,-2.6234978719,-0.2684910008,2.63449991  
85\C,-2.4564300273,0.5637033727,3.9193294253\C,-0.4033460093,-0.0266839212,1.34135  
50863\C,0.3101158941,0.5475068877,0.2553562143\C,1.6577393644,0.2920517958,0.0628  
02203\C,2.3524175101,-0.5445760165,0.9444227991\C,1.6728696008,-1.1196146818,2.022  
5238175\C,0.3228420257,-0.8698260096,2.2237313329\H,2.1760405453,0.7439962277,-0.7  
776671374\H,-0.1824828172,-1.3244900281,3.070453109\H,3.4081484787,-0.7448614513,0  
.7938088973\H,2.2048237037,-1.7683971504,2.7121991169\H,-3.0815565001,0.166227727  
9,4.724383135\H,-2.7427463443,1.6047610468,3.7438443123\H,-1.4146122382,0.55511739  
07,4.2532943119\H,-2.2483123576,0.9305460074,0.7990196869\H,-0.2232796618,1.197741  
4923,-0.4335083031\H,-3.6767711108,-0.2570539578,2.3363683839\H,-2.3712934066,-1.31  
45231279,2.8487401391\\Version=AM64L-G09RevC.01\State=2-A\HF=-349.3942228\

Sum of electronic and zero-point Energies= -349.221410

Sum of electronic and thermal Energies= -349.212930

Sum of electronic and thermal Enthalpies= -349.211986

Sum of electronic and thermal Free Energies= -349.255402

## TRANSITION STATES

### HEMA-HEMA-Toluene

C,2.6477116072,-0.4030498998,-1.3499845965\C,2.2436722156,0.8877132256,-0.70119079  
04\C,2.8825508032,2.1582935882,-1.1797441754\C,4.368986479,2.2197014521,-0.7922572  
702\C,1.829061428,0.8740617456,0.7058479036\O,1.5598678302,-0.3595390379,1.1614164  
9\C,1.0597418646,-0.4819628688,2.5047449247\C,2.0901227338,-0.1457689781,3.5820945  
34\O,1.9960441066,1.1704341821,4.0788651015\O,1.7093080287,1.8819956859,1.3923211  
117\C,0.1462017828,1.0435130533,-1.5066016893\C,-0.35885603,2.2733772868,-1.193763  
8764\C,-1.1173513822,2.4825372893,0.0574337645\O,-1.2752959388,1.3766091209,0.7966  
373738\C,-2.076570531,1.4980175453,1.9893597801\C,-1.4586596788,2.4051611503,3.058  
7697785\O,-2.0555126438,3.6814460239,3.1262189371\C,-0.1583988511,3.4954681887,-2.  
0366479592\O,-1.5803988121,3.5667062932,0.3757330323\H,3.5931286365,-0.7642709998  
, -0.9235868943\H,2.8017709613,-0.2571420335,-2.4231148228\H,1.9064209181,-1.190156  
5417,-1.1962821959\H,0.764090723,-1.5301955333,2.5689021759\H,0.1785812262,0.15632  
58078,2.6201357169\H,3.0942811248,-0.3628116718,3.1877095262\H,1.9224294276,-0.803  
7238594,4.4392809024\H,1.9955699467,1.7673780222,3.3153201097\H,2.3598478141,3.01

37444827,-0.7445380005\H,2.7860857798,2.2196534989,-2.2705486625\H,4.4842620677,2.  
1758138852,0.2948095495\H,4.81348732,3.1547221746,-1.1426719829\H,4.9296544336,1.  
3908425103,-1.2342501966\H,-0.1602759735,0.166497297,-0.9446169478\H,0.5667288745,  
0.8788418079,-2.4953965719\H,0.3494838847,4.283510509,-1.4706787955\H,-1.123316321  
3,3.908989881,-2.3480910891\H,0.4285298632,3.2594515588,-2.9265532434\H,-2.1593092  
017,0.4675812635,2.3396942902\H,-3.071461861,1.8668163705,1.719541093\H,-0.3753346  
09,2.4690094081,2.8816134835\H,-1.609100078,1.9489754893,4.0412735045\H,-1.9769709  
693,4.0701496261,2.242609677\Version=AM64L-G09RevC.01\State=2-A\HF=-960.169118  
6\

Sum of electronic and zero-point Energies= -959.810735  
Sum of electronic and thermal Energies= -959.788540  
Sum of electronic and thermal Enthalpies= -959.787596  
Sum of electronic and thermal Free Energies= -959.863407

### ST-ST-Toluene

C,-0.6131879293,-0.7499985376,3.3361743541\C,0.0072252769,-0.8051309895,2.07087168  
39\C,1.2022607002,-1.5474719464,1.9559507664\C,1.7543832195,-2.1944712216,3.053935  
435\C,1.129447674,-2.1234133438,4.3019015091\C,-0.0560268019,-1.3975127003,4.43386  
49773\C,-0.567749848,-0.1952215981,0.8925218976\C,-1.6563607934,0.8357708011,0.972  
7468096\C,-1.1407330122,2.1828923987,1.5043059653\C,-1.6976469668,-1.8969519985,-0  
.0738546325\C,-0.8212685886,-2.9295298178,-0.2494021077\C,0.1361695678,-3.05194513  
01,-1.3425511447\C,0.2626900434,-2.0827236546,-2.3560041799\C,1.2002781628,-2.2300  
868945,-3.3720205731\C,2.0402807914,-3.3452221613,-3.4039938863\C,1.9331047842,-4.3  
121403821,-2.4036501163\C,0.9961205977,-4.1647073453,-1.3863095911\H,2.6766742498,  
-2.7565663739,2.9397589382\H,-1.5360427298,-0.1908661767,3.4624370384\H,1.56197263  
81,-2.6266071087,5.1608101829\H,-0.5491392542,-1.3346899296,5.3994975106\H,0.91903  
77122,-4.9194206087,-0.607348534\H,2.5824586318,-5.1823285877,-2.41603452\H,-0.3768  
623194,-1.2047380972,-2.3494977451\H,2.7711538231,-3.4562841,-4.1986451424\H,1.279  
6744156,-1.4690095666,-4.1426089085\H,-0.7415479224,-3.6803600706,0.5343400923\H,-  
1.9444977394,-1.2222294593,-0.8888063625\H,-2.4143226073,-1.937646987,0.7409968091  
\H,-1.9455226845,2.9235121152,1.5327625249\H,-0.3426123899,2.5698102701,0.86368067  
17\H,-0.7357734871,2.0749635065,2.5147487392\H,0.1072477074,-0.1116146761,0.040634  
2733\H,1.6891578068,-1.6117147083,0.9850603018\H,-2.0849010999,0.9852733894,-0.024

5897871\H,-2.4756846288,0.4800366908,1.6098227504\\Version=AM64L-G09RevC.01\State=2-A\HF=-658.9103122\

Sum of electronic and zero-point Energies= -658.601851

Sum of electronic and thermal Energies= -658.585944

Sum of electronic and thermal Enthalpies= -658.585000

Sum of electronic and thermal Free Energies= -658.648470

### ST-HEMA(R)-Toluene

C,4.5799134404,-1.6626383722,3.7778136522\C,4.6167736612,-2.8528033009,4.4979577572\C,3.4481836249,-3.3662777574,5.061536061\C,2.2428848935,-2.6800524668,4.8942294832\C,2.2066303099,-1.48781369,4.1808416011\C,3.3780025408,-0.9517815998,3.6146323837\C,3.3881125535,0.312957989,2.8837496722\C,2.4396913577,1.2921885169,2.9971893743\C,3.0518266607,2.712784498,4.6318401213\C,3.9809268843,3.6277173792,3.8902894434\C,3.7093067521,1.7133041252,5.473528466\O,2.8653184323,1.0444034418,6.2774775635\C,3.4002749569,-0.0568359527,7.038164699\C,4.3045242401,0.3769927094,8.1885418046\O,5.6786278119,0.3948901195,7.8678714325\C,1.7009988193,3.2394881125,5.0315723346\C,1.8082155836,4.3090581916,6.1299875472\O,4.9083356615,1.4619097366,5.420797795\H,4.7691356289,3.0624353348,3.3872718274\H,4.4760279467,4.323183708,4.5812462486\H,3.4302485776,4.2216034627,3.1543922197\H,3.9376098054,-0.7370140375,6.3679030905\H,2.5076652192,-0.5554034049,7.4198623203\H,4.1904879566,-0.3407036152,9.006626499\H,3.9617592621,1.3570465617,8.5547367869\H,5.7615378908,0.8136585937,6.9964384775\H,1.0693579347,2.4201300425,5.3856897714\H,1.2167806031,3.6735829642,4.1478022834\H,0.8152094992,4.6701937111,6.4113420124\H,2.3975851444,5.1663598484,5.7919821863\H,2.2865350851,3.895817926,7.023514003\H,2.4524756036,2.1341091431,2.311626895\H,1.4957765194,1.0946835122,3.4975166813\H,5.4942543252,-1.2565270868,3.3534724402\H,5.5584511515,-3.3778984019,4.6235646209\H,1.259410386,-0.9726478157,4.0527850032\H,3.4749556765,-4.2954833254,5.6219544357\H,1.3272943306,-3.0793716563,5.3201390554\H,4.2818822689,0.5172068554,2.2971459502\\Version=EM64L-G09RevB.01\State=2-A\HF=-809.5423816\

Sum of electronic and zero-point Energies= -809.208996

Sum of electronic and thermal Energies= -809.190030

Sum of electronic and thermal Enthalpies= -809.189086

Sum of electronic and thermal Free Energies= -809.257761

### HEMA-ST(R)-Toluene

C,0.6862063502,0.6162796737,-0.707458844\H,1.4782007103,1.2621228188,-1.070052927  
8\H,0.0264568014,1.030221036,0.0503405184\C,0.7778356888,-0.741279615,-0.844876624  
9\C,-0.1423587618,-1.7077661758,-0.1591975099\H,-0.7130389117,-2.300793904,-0.88242  
663\H,-0.8422332644,-1.1745959922,0.4879084706\H,0.4262851517,-2.4192676009,0.4483  
372563\C,1.7726226864,-1.3368294622,-1.7469601734\O,1.9206667893,-2.5447591902,-1.8  
82887472\O,2.5079784841,-0.438081953,-2.4229744822\C,3.4621982123,-0.9369591631,-3.  
3783367122\H,3.8090597535,-0.0315292484,-3.8785321692\H,2.950676855,-1.5807290929,  
-4.101721811\C,4.6389829945,-1.6865057991,-2.7535612576\H,4.8043591593,-1.29520010  
89,-1.7383965968\H,5.5361066374,-1.4721121828,-3.3412968304\O,4.4977198511,-3.0891  
276673,-2.7571046437\H,3.6269217338,-3.2866189796,-2.3786289984\C,-0.6251373649,1.4  
031285789,-2.3579505401\H,0.9296928717,3.5514300707,-2.688569261\C,0.0486537951,3  
.7665516977,-2.0881441186\C,-2.2114232615,4.3133790578,-0.5578989259\C,-0.14951551  
71,5.0430468983,-1.578707049\C,-0.8819649532,2.7325160641,-1.8491468885\C,-2.016153  
3557,3.0340661643,-1.0652240465\C,-1.2820635411,5.3248606528,-0.810485492\H,0.5776  
566535,5.8235363787,-1.7812418748\H,-2.7506490615,2.2605628064,-0.8592853782\H,-1.  
4390805489,6.3226102668,-0.4133946106\H,-3.0939711452,4.5256413714,0.0380350001\  
H,0.1750475841,1.3315219983,-3.0934787815\C,-1.6987047939,0.3604408728,-2.46362037  
49\H,-1.2308236973,-0.6008283878,-2.7016108633\H,-2.204223668,0.2263450181,-1.49858  
13498\H,-3.4846770563,-0.0827570374,-3.6283676321\C,-2.7319536743,0.7064924423,-3.5  
468884468\H,-3.2416876837,1.6469388163,-3.3183448376\H,-2.2466655031,0.8170468765,  
-4.5212650908\\Version=AM64L-G09RevC.01\State=2-A\HF=-809.5384601\

Sum of electronic and zero-point Energies= -809.205113

Sum of electronic and thermal Energies= -809.185945

Sum of electronic and thermal Enthalpies= -809.185001

Sum of electronic and thermal Free Energies= -809.255882

## GAS PHASE CALCULATIONS (M06-2X/6-31+G(d,p))

### REACTANTS

#### *s-trans*-HEMA-Gas

C,-1.1576541224,-0.4264890268,0.1178603669\H,-0.4026348464,-1.1776983034,0.3192154  
238\H,-1.6494410756,0.0427308589,0.9647328087\C,-1.480321002,-0.0827677034,-1.13160  
99792\C,-2.5106145315,0.9471544716,-1.4954805571\H,-3.2942803212,0.506259624,-2.118  
0300926\H,-2.0587671345,1.7521758306,-2.081841651\H,-2.9631588241,1.3694537546,-0.  
596628146\C,-0.8041110095,-0.7285789841,-2.2964138365\O,-1.0573878424,-0.426935332  
9,-3.4477223055\O,0.0936900894,-1.6582892623,-1.9624953369\C,0.8564205915,-2.261858  
6916,-3.0266071626\H,1.595647825,-2.8579675681,-2.4896641955\H,1.3621932102,-1.476  
9593741,-3.5982142567\C,0.0306029903,-3.1391665125,-3.9697792942\H,-0.8420745438,-  
3.5213240287,-3.4175882995\H,0.6385532388,-4.0012476534,-4.2597474144\O,-0.3370957  
081,-2.5082426797,-5.1702431971\H,-0.7745659837,-1.6762514188,-4.9387438746\  
Version=AM64L-G09RevC.01\State=1-A\HF=-460.1439501\

Sum of electronic and zero-point Energies= -459.984539

Sum of electronic and thermal Energies= -459.974691

Sum of electronic and thermal Enthalpies= -459.973747

Sum of electronic and thermal Free Energies= -460.020086

#### *anti*-HEMA-R-Gas

C,0.3634418221,-1.1031154302,0.8030200578\C,0.5764875472,-2.5654645262,0.630346885  
4\H,0.9011310053,-2.8028934542,-0.3829496397\H,-0.3467593201,-3.1154490327,0.85491  
22571\H,1.33345566,-2.9261795234,1.339377396\C,0.6765991618,-0.2180460369,-0.30411  
08294\O,1.1362843644,-0.5914372375,-1.3786658899\O,0.408072183,1.0763693871,-0.037  
5847325\C,0.7603033876,2.0436520359,-1.0419029267\H,1.823435919,1.9458303067,-1.28  
64350725\H,0.5881953505,2.996785293,-0.5390587514\C,-0.0723187678,1.9460005555,-2.  
3227038718\H,-0.2623067753,2.9582656659,-2.691903861\H,-1.0463508045,1.4975668635,  
-2.070692229\O,0.565666773,1.2663322553,-3.3739599554\H,0.8543537502,0.4091278986,  
-3.0266861505\C,-0.2422310008,-0.5751336145,2.0634898605\H,0.2183928404,0.38099338  
46,2.3299776078\H,-0.0454215373,-1.2832447259,2.8760453845\C,-1.7620347997,-0.37404  
22399,1.9159148916\H,-2.1939539712,-0.0173938182,2.8548425911\H,-2.2567212355,-1.3



125021723,1.6476974482\H,-1.9737205522,0.3629801658,1.1370285298\\Version=AM64L-G09RevC.01\State=2-A\HF=-500.0164953\

Sum of electronic and zero-point Energies= -499.818780  
Sum of electronic and thermal Energies= -499.806797  
Sum of electronic and thermal Enthalpies= -499.805853  
Sum of electronic and thermal Free Energies= -499.858263

### ST-monomer-Gas

C,-3.0243558344,1.9782263187,-4.0551050876\C,-3.8547515045,1.7599884736,-2.9543920156\C,-3.5781679253,0.7333003541,-2.0587346035\C,-2.4608816466,-0.0942164962,-2.2400310156\C,-1.6435476696,0.1278145587,-3.3550060342\C,-1.9179646878,1.1561676899,-4.2538525603\C,-2.1203972397,-1.1858137525,-1.3070047114\C,-2.6308885405,-1.3757164831,-0.0874947737\H,-0.7786972723,-0.5116489768,-3.5132334005\H,-1.2681952272,1.3131493597,-5.1092739823\H,-4.2445380642,0.5636987173,-1.2183760925\H,-3.2440670193,2.7786848638,-4.7544750579\H,-4.7262155039,2.3886720441,-2.7992057026\H,-1.3649228341,-1.8819117445,-1.6695091573\H,-3.3676748711,-0.7052674739,0.3450788018\H,-2.3127351595,-2.2131254528,0.5236153931\\Version=AM64L-G09RevC.01\State=1-A\HF=-309.519985\

Sum of electronic and zero-point Energies= -309.385611  
Sum of electronic and thermal Energies= -309.378867  
Sum of electronic and thermal Enthalpies= -309.377922  
Sum of electronic and thermal Free Energies= -309.417027

### ST-radical-Gas

C,-1.7867121225,0.2485942431,1.5079772412\C,-2.6235777916,-0.2677521829,2.6338739516\C,-2.4545743153,0.5629099509,3.9192851969\C,-0.4035752536,-0.0267555191,1.3409949252\C,0.3100243197,0.5469850684,0.2556861328\C,1.6572844327,0.2920483192,0.063862556\C,2.3513098831,-0.5439080183,0.9457347278\C,1.6717413632,-1.1187959602,2.0231757222\C,0.3220392494,-0.8693388666,2.2234614133\H,2.1759085893,0.7438384679,-0.7764039898\H,-0.1840041533,-1.3242725401,3.0695725788\H,3.4071139053,-0.743943357,0.7956943287\H,2.2035022652,-1.767505944,2.7129796814\H,-3.0770633706,0.1647436974,4.7261615496\H,-2.7417732357,1.6039974241,3.7456442559\H,-1.4117648261,0.55604158

92,4.2498938024\H,-2.2485895668,0.928965306,0.7968907138\H,-0.2234515635,1.1967610  
691,-0.4334720705\H,-3.6772770747,-0.2560649134,2.3366756219\H,-2.3725637343,-1.314  
5478336,2.8463106605\Version=AM64L-G09RevC.01\State=2-A\HF=-349.3926796\

Sum of electronic and zero-point Energies= -349.219785  
Sum of electronic and thermal Energies= -349.211308  
Sum of electronic and thermal Enthalpies= -349.210364  
Sum of electronic and thermal Free Energies= -349.253768

## TRANSITION STATES

### HEMA-HEMA-Gas

C,2.6368257402,-0.4209333121,-1.3513658919\C,2.2437516691,0.8771173717,-0.71015378  
4\C,2.8960635095,2.1397814028,-1.1917477682\C,4.3825872263,2.1885615423,-0.8037532  
252\C,1.8288955977,0.8742780127,0.6973959501\O,1.5568812262,-0.3566553929,1.159922  
533\C,1.0603013586,-0.4645363311,2.5052527512\C,2.0890902256,-0.1034952691,3.57863  
82081\O,1.959276099,1.2021461095,4.0830604435\O,1.7126764377,1.8864726979,1.37542  
60024\C,0.1484580575,1.0561998046,-1.5186474177\C,-0.3517975667,2.2824716861,-1.18  
73259531\C,-1.1159725617,2.4762604186,0.0651002135\O,-1.2719885773,1.3600025783,0.  
790573423\C,-2.0734419041,1.4760686907,1.9837274072\C,-1.4632864093,2.3948302639,  
3.0510399352\O,-2.1149760015,3.6372678331,3.1523895811\C,-0.1462302585,3.51864895  
79,-2.0074551379\O,-1.5832953152,3.5536657824,0.3906250142\H,3.5776022196,-0.79064  
09416,-0.921814935\H,2.7938872485,-0.2841578677,-2.4256265265\H,1.887874183,-1.199  
8733692,-1.192843484\H,0.7704394181,-1.5140391011,2.5812824945\H,0.1763171469,0.17  
10539534,2.6144418272\H,3.0962994043,-0.2932437505,3.1756575029\H,1.9472165194,-0.  
769878912,4.4345337936\H,1.9700182331,1.808562974,3.3280946224\H,2.3814052565,2.9  
998568459,-0.7560086629\H,2.7996875691,2.2014105416,-2.28291986\H,4.4953038474,2.1  
462470413,0.2835878904\H,4.8372193631,3.1185953213,-1.1547073332\H,4.9370900785,1.  
.3540649286,-1.2432815285\H,-0.163641118,0.1730258234,-0.9694479558\H,0.5695986424  
,0.9044520195,-2.5094338403\H,0.3568343398,4.2959173784,-1.4226061292\H,-1.1098691  
067,3.9388915298,-2.3135857398\H,0.4452886623,3.2995718083,-2.8989129914\H,-2.1505  
746774,0.4442140606,2.3323785982\H,-3.0699988506,1.8407204332,1.7142582471\H,-0.38  
87782778,2.5054102224,2.844166611\H,-1.56258154,1.9214713709,4.0322061991\H,-2.039

6521144,4.064934842,2.2876949155\\Version=AM64L-G09RevC.01\\State=2-A\\HF=-960.16  
15648\\

Sum of electronic and zero-point Energies= -959.802838  
Sum of electronic and thermal Energies= -959.780688  
Sum of electronic and thermal Enthalpies= -959.779743  
Sum of electronic and thermal Free Energies= -959.855373

### ST-ST-Gas

C,-0.6069708315,-0.7508577191,3.3296177705\C,0.0061540586,-0.8076844982,2.06143963  
11\C,1.1962043147,-1.5559981669,1.9387394336\C,1.7500727714,-2.2073961627,3.032683  
6455\C,1.1323689365,-2.1346984583,4.2835746358\C,-0.0477696137,-1.4027384691,4.423  
1575972\C,-0.5726924252,-0.1950877435,0.8866351174\C,-1.65712503,0.8396754085,0.97  
36475205\C,-1.1350196938,2.1848726515,1.5035915005\C,-1.7103644285,-1.8978625869,-  
0.0758058874\C,-0.8311393529,-2.9281164561,-0.2464448472\C,0.1313202404,-3.0495048  
77,-1.3347611814\C,0.2555329409,-2.0851487912,-2.3524615287\C,1.2001356622,-2.22948  
24388,-3.3617531061\C,2.049567139,-3.337049886,-3.3827245043\C,1.9446524845,-4.2993  
513835,-2.3784049837\C,1.0007253003,-4.154613045,-1.3677790243\H,2.6686223813,-2.77  
42963038,2.9127298348\H,-1.5259901671,-0.1866536203,3.4614728815\H,1.566671807,-2.  
6414835313,5.1393846049\H,-0.5352787262,-1.3386851718,5.3914930649\H,0.925194455,-  
4.9053792921,-0.5849280633\H,2.6014442956,-5.1639792188,-2.3824662231\H,-0.3928477  
863,-1.2136365305,-2.3545612847\H,2.785976481,-3.4459658446,-4.1724829164\H,1.2773  
152315,-1.4721272718,-4.1361864548\H,-0.7503345724,-3.6747202796,0.5410773079\H,-1.  
9581110953,-1.2266155336,-0.8933392189\H,-2.4279152209,-1.9373158606,0.7382361855\H,  
-1.9375762275,2.9276400177,1.5408403084\H,-0.3413737477,2.5716682795,0.85742275  
48\H,-0.7205858,2.0732783169,2.5096772624\H,0.0980477896,-0.1135541436,0.031064735  
6\H,1.676833405,-1.6220771954,0.9648375999\H,-2.0923632808,0.991057505,-0.02082292  
72\H,-2.4739236946,0.4855433012,1.6151057587\\Version=AM64L-G09RevC.01\\State=2-  
A\\HF=-658.9075181\\

Sum of electronic and zero-point Energies= -658.599067  
Sum of electronic and thermal Energies= -658.583123  
Sum of electronic and thermal Enthalpies= -658.582179  
Sum of electronic and thermal Free Energies= -658.646093

### ST-HEMA(R)-Gas

C,4.60328995,-1.5965572382,3.8519612089\C,4.6522156228,-2.7804795742,4.5804474516  
\C,3.478444469,-3.3394817519,5.0867877404\C,2.2563914806,-2.7045303182,4.855547139  
8\C,2.2078501335,-1.5175744576,4.1341384389\C,3.3833671127,-0.9371987243,3.6244207  
702\C,3.3765232677,0.326227093,2.8909928913\C,2.415517194,1.2922432999,3.00813439  
08\C,3.0370183662,2.7153694952,4.6351221897\C,3.9797730306,3.6146926336,3.8922052  
642\C,3.6824375948,1.7055140767,5.4769745102\O,2.8300722917,1.0647376902,6.294465  
9048\C,3.33976446,-0.0501818292,7.0532793298\C,4.3482186197,0.3401925109,8.1339879  
552\O,5.692189382,0.1824134061,7.7519001884\C,1.6932672126,3.2605880867,5.0329305  
355\C,1.8119080711,4.3342193836,6.1260067879\O,4.8719801002,1.4255452262,5.404438  
8896\H,4.7641215345,3.0356243607,3.3989104177\H,4.4814928575,4.3073458614,4.58120  
90515\H,3.4408502191,4.2118475862,3.1498012139\H,3.7860425759,-0.7822564822,6.371  
8707436\H,2.4387042096,-0.4757207407,7.4992343562\H,4.2008725227,-0.3160065688,8.9  
97433227\H,4.1317202086,1.3700354561,8.4607326803\H,5.7942676311,0.6179233321,6.8  
918857176\H,1.0536955697,2.4497033057,5.3924717786\H,1.2125345132,3.695718333,4.1  
47155098\H,0.8236705223,4.7103170848,6.4048316957\H,2.4130839631,5.1823152499,5.7  
85225754\H,2.283028266,3.9182188605,7.0219400776\H,2.410850705,2.1341551786,2.322  
2588732\H,1.4791977191,1.0817549945,3.5179943412\H,5.5206721491,-1.1498608334,3.4  
782388305\H,5.6075131528,-3.2625974071,4.7618999288\H,1.2490220133,-1.0423472191,  
3.9502001154\H,3.5150298246,-4.2640927744,5.6541850049\H,1.3375627855,-3.14038772  
83,5.2362469152\H,4.2688266979,0.545028142,2.3075665918\Version=EM64L-G09RevB.  
01\State=2-A\HF=-809.53717\

Sum of electronic and zero-point Energies= -809.203645

Sum of electronic and thermal Energies= -809.184657

Sum of electronic and thermal Enthalpies= -809.183713

Sum of electronic and thermal Free Energies= -809.252813

### HEMA-ST(R)-Gas

C,0.6780869553,0.6125453988,-0.6958931116\H,1.4698248003,1.2610844095,-1.05412737  
59\H,0.0169483211,1.0229232697,0.0628602829\C,0.774486287,-0.7436370735,-0.8391507  
367\C,-0.1379819902,-1.7195736598,-0.1571673229\H,-0.7015985562,-2.3164823503,-0.88  
27679531\H,-0.842484676,-1.1954048654,0.4925029189\H,0.437706295,-2.429256063,0.44

5770742\C,1.7695361488,-1.3325149732,-1.7479182139\O,1.9257398628,-2.5367460163,-1.8835334697\O,2.4908077577,-0.4256162212,-2.4311200294\C,3.4503723583,-0.9245119074,-3.380282229\H,3.7952764192,-0.0187260992,-3.88209764\H,2.9448031868,-1.5742120562,-4.1027797549\C,4.6256539007,-1.6749462334,-2.7487101498\H,4.76503648,-1.3020464064,-1.7218271749\H,5.5328205425,-1.4355242641,-3.3116589012\O,4.5043448498,-3.0742662009,-2.7904275996\H,3.6431720221,-3.2989249655,-2.4073586119\C,-0.6234364306,1.3976631711,-2.3509081162\H,0.9392238283,3.5390143813,-2.6841310662\C,0.0568542568,3.759663172,-2.0875936109\C,-2.2065824499,4.3204039015,-0.5694282011\C,-0.1383053754,5.0381336485,-1.5833493795\C,-0.8782623892,2.7299302124,-1.8493907014\C,-2.0142025018,3.0390146417,-1.0715371863\C,-1.2725508008,5.3270383562,-0.8211462941\H,0.5927658693,5.8150431997,-1.7854546837\H,-2.7526808797,2.2689876673,-0.8667695176\H,-1.4272434954,6.326691012,-0.4281318406\H,-3.0909201657,4.5380628113,0.0218594856\H,0.1798830158,1.3195079079,-3.082470955\C,-1.7005669368,0.3584584821,-2.4574982504\H,-1.2349860207,-0.6053678239,-2.6900565954\H,-2.2082119722,0.2282029974,-1.4927547956\H,-3.4878245033,-0.0812005061,-3.623239218\C,-2.7304810944,0.7039284176,-3.543915106\H,-3.2347329144,1.6489130292,-3.3222267204\H,-2.243286005,0.8067455984,-4.5181689167\\Version=AM64L-G09RevC.01\State=2-A\HF=-809.53317\

|                                              |             |
|----------------------------------------------|-------------|
| Sum of electronic and zero-point Energies=   | -809.199612 |
| Sum of electronic and thermal Energies=      | -809.180463 |
| Sum of electronic and thermal Enthalpies=    | -809.179519 |
| Sum of electronic and thermal Free Energies= | -809.250293 |
